# Supplementary material
Source: Springer Nature journal article supplement (https://www.springermedizin.de/resource/supplementary/12882_2004_35_MOESM2_ESM.pdf/9454814)

# Renal outcome stratified

for Proteinuria at start

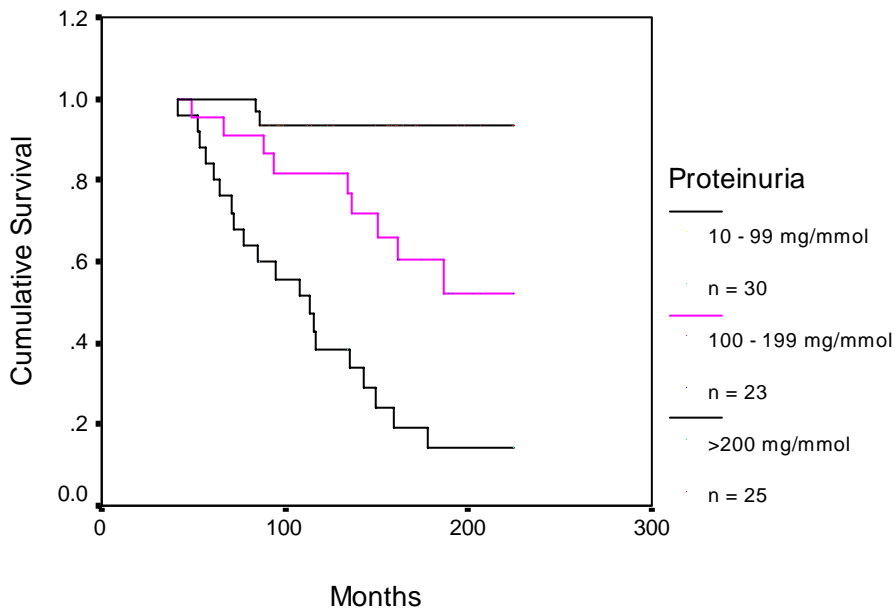

Supplement: MOESM2 [file 9454814]
